# Supplementary material
Source: publisher figshare collection journal article supplement (https://acs.figshare.com/ndownloader/files/5456711)
Supplement: Supplementary file 1 [file 5456711]

smiles,name,kind,hit,why
